# Supplementary material for: l-Ergothioneine promotes the formation of long gold nanowires and their 2D assembly
Source: Royal Society of Chemistry journal article supplement (doi:10.1039/d5nr01120e), 2025-01-01
Supplement: d5nr01120e1.pdf [file d5nr01120e1.pdf]

## Supporting information for

# L-Ergothioneine Promotes the Formation of Long Gold Nanowires and Their 2D Assembly

*Jianguan Zhang<sup>1</sup>, Zhaohan Lu<sup>1</sup>, Guodan Wei<sup>1</sup>, Zhiyong Wang<sup>1</sup>, Feng Tang<sup>2</sup>, Zhaoxia Jin<sup>1</sup>\**

<sup>1</sup> School of Chemistry and Life Resources, Renmin University of China, Beijing, 100872, P. R. China

<sup>2</sup> School of Chemistry and Chemical Engineering, Shandong University of Technology, Zibo 255036, P. R. China

## Content List

|                                                                                                                                                                        |    |
|------------------------------------------------------------------------------------------------------------------------------------------------------------------------|----|
| Part 1. The fabrication of gold nanowires in the presence of various gold seeds.....                                                                                   | 3  |
| I. Synthesis of gold seeds.....                                                                                                                                        | 3  |
| II. Synthesis of gold nanowires in the presence of gold seeds.....                                                                                                     | 3  |
| Part 2. Figures .....                                                                                                                                                  | 4  |
| Figure S1. SEM images showing that mussy gold nanostructures generated in CTAB/HAuCl <sub>4</sub> /AA procedure. ....                                                  | 4  |
| Figure S2. SEM image of obtained long gold nanowires after adding EGT in the CTAB/HAuCl <sub>4</sub> /AA system. ....                                                  | 4  |
| Figure S3. TEM images of gold nanowires. ....                                                                                                                          | 5  |
| Figure S4. The comparison of the products obtained in glass vials (a-b) and PP vials (c-d). ....                                                                       | 5  |
| Figure S5. SEM images of gold nanowires generated with NaBH <sub>4</sub> -seeds (a) and CA-seeds (b). TEM images of NaBH <sub>4</sub> -seeds (c) and CA-seeds (d)..... | 6  |
| Figure S6. SEM images of gold nanowires generated in the molar ratio of HAuCl <sub>4</sub> :AA at 1:1.25 (a) and 1:2.5 (b).....                                        | 7  |
| Figure S7. (a, c) SEM image of gold nanowires in two different CTAB concentrations. (b, d) The histogram of diameter distribution of gold nanowires in (a) or (c)..... | 7  |
| Figure S8. SEM images of gold nanostructures obtained in the lower concentration range of CTAB, 0.5–2 mM. ....                                                         | 8  |
| Figure S9. Longer gold nanowires with spheres generated in the condition of 0.01 mM EGT and 8 mM of CTAB. ....                                                         | 8  |
| Figure S10. Extinction spectrum (a) and CD spectrum (b) of gold nanowires generated in the condition of 0.1 mM EGT and 16 mM of CTAB. ....                             | 9  |
| Figure S11. SEM images of the products by adding 0.1 mM L-cysteine (a), L-histidine (b), and betaine (c), to replace EGT. ....                                         | 9  |
| Figure S12. SEM images of gold nanoparticles obtained in different concentration of 2-MAD. ....                                                                        | 10 |
| Figure S13. SEM images of gold nanowires obtained in the presence of 16 mM CTAC. ....                                                                                  | 10 |
| Figure S14. SEM images of gold nanoparticles obtained in different concentration of CPC. ....                                                                          | 11 |
| Figure S15. SEM images of gold nanowires aggregated on the PP membrane. ....                                                                                           | 11 |
| Figure S16. SEM images of gold nanowires aggregated on MCE membranes. ....                                                                                             | 12 |
| Figure S17. SEM images of branched leaf-shaped gold nanostructures generated under varied concentrations of KI. ....                                                   | 13 |
| Figure S18. SEM images of assembled gold structures obtained at conditions with C <sub>KI</sub> (μM): C <sub>CTAB</sub> (mM) 2:2, 3:3, 3:4 and 4:4 respectively. ....  | 14 |
| Figure S19. SEM images of the products obtained at conditions with C <sub>KI</sub> (μM): C <sub>CTAB</sub> (mM) 5:5 and 6:6 respectively. ....                         | 14 |
| Figure S20. XPS characterization of these assembled 2D leaf-like gold nanostructures. ....                                                                             | 15 |
| Figure S21. UV-Vis spectra of HAuCl <sub>4</sub> (0.1 mM) before and after adding histidine/betaine (a) or L-Cys/EGT/2-MAD (b). ....                                   | 15 |
| Figure S22. The non-covalent interaction between CTAB and [MAD-Au(I)Cl] <sup>-</sup> calculated by DFT. ....                                                           | 16 |

Part 1. The fabrication of gold nanowires in the presence of various gold seeds.

## **I. Synthesis of gold seeds**

### **Synthesis of NaBH<sub>4</sub>-seeds**

30  $\mu\text{L}$  HAuCl<sub>4</sub> (82.5 mM) was added to 7.5 mL of aqueous CTAB (100 mM) solution, the clear solution changed to orange-yellow color, followed by the injection of 200  $\mu\text{L}$  NaBH<sub>4</sub> (40 mM) aqueous solution in an ice bath, the solution immediately changed to brown color, and then mixed the solution rapidly for 2 min by shaking. Finally, the seed solution was kept in a water bath at 30°C for 3h to decompose excess NaBH<sub>4</sub>.

### **Synthesis of CA-seeds**

24  $\mu\text{L}$  HAuCl<sub>4</sub> (82.5 mM) was added to 7.5 mL trisodium citrate (0.27 mM) aqueous solution, followed by the injection of 200  $\mu\text{L}$  NaBH<sub>4</sub> (100 mM) solution in an ice bath, and then mixed the solution rapidly for 2 min by shaking. Finally, the seed solution was kept in a water bath at 30°C for 3h to decompose excess NaBH<sub>4</sub>.

## **II. Synthesis of gold nanowires in the presence of gold seeds**

To observe the influence of gold seeds, typically, gold seeds (25  $\mu\text{L}$ , either NaBH<sub>4</sub>-seeds or CA-seeds) generated by NaBH<sub>4</sub> were added into the HAuCl<sub>4</sub>/CTAB/EGT aqueous solutions and the mixture was incubated for 10 minutes. Finally, AA was added. The following procedure were kept the same as those fabrications without gold seeds.

## Part 2. Figures

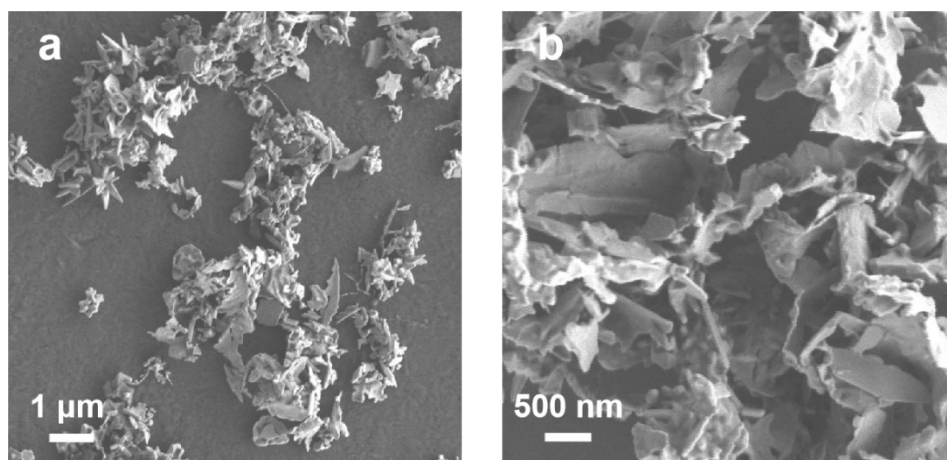

Figure S1. SEM images showing that mussy gold nanostructures generated in CTAB/HAuCl<sub>4</sub>/AA procedure. (a) The concentrations for CTAB, HAuCl<sub>4</sub> and AA were 5, 0.4, and 2 mM, respectively. (b) The concentrations of CTAB, HAuCl<sub>4</sub> and AA were 30, 0.4, and 8 mM, respectively.

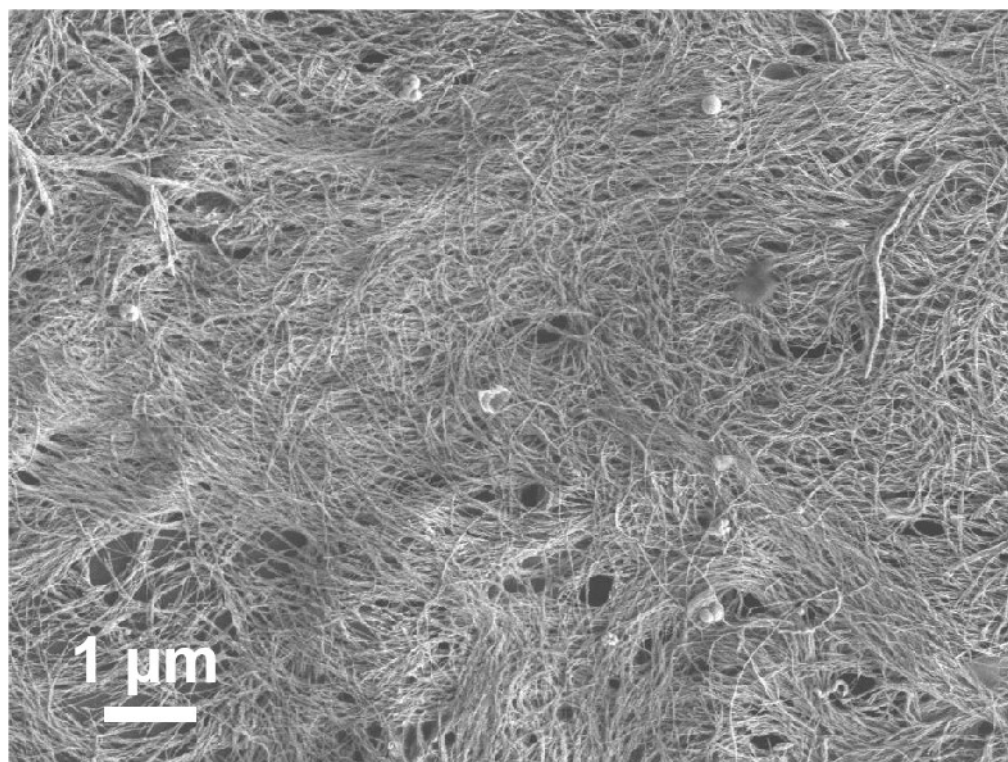

Figure S2. SEM image of obtained long gold nanowires after adding EGT in the CTAB/HAuCl<sub>4</sub>/AA system. The concentrations of EGT, HAuCl<sub>4</sub>, CTAB and AA were

0.1, 0.4, 8, and 2 mM, respectively.

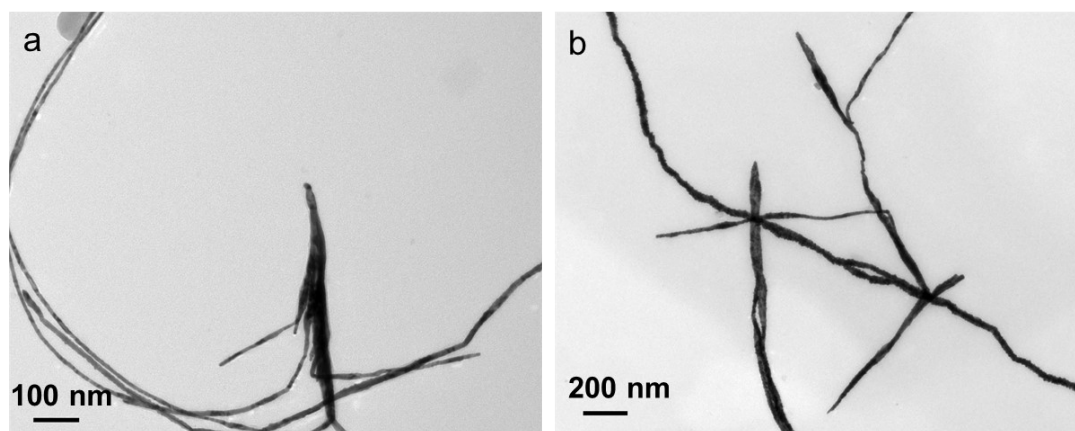

Figure S3. TEM images of gold nanowires.

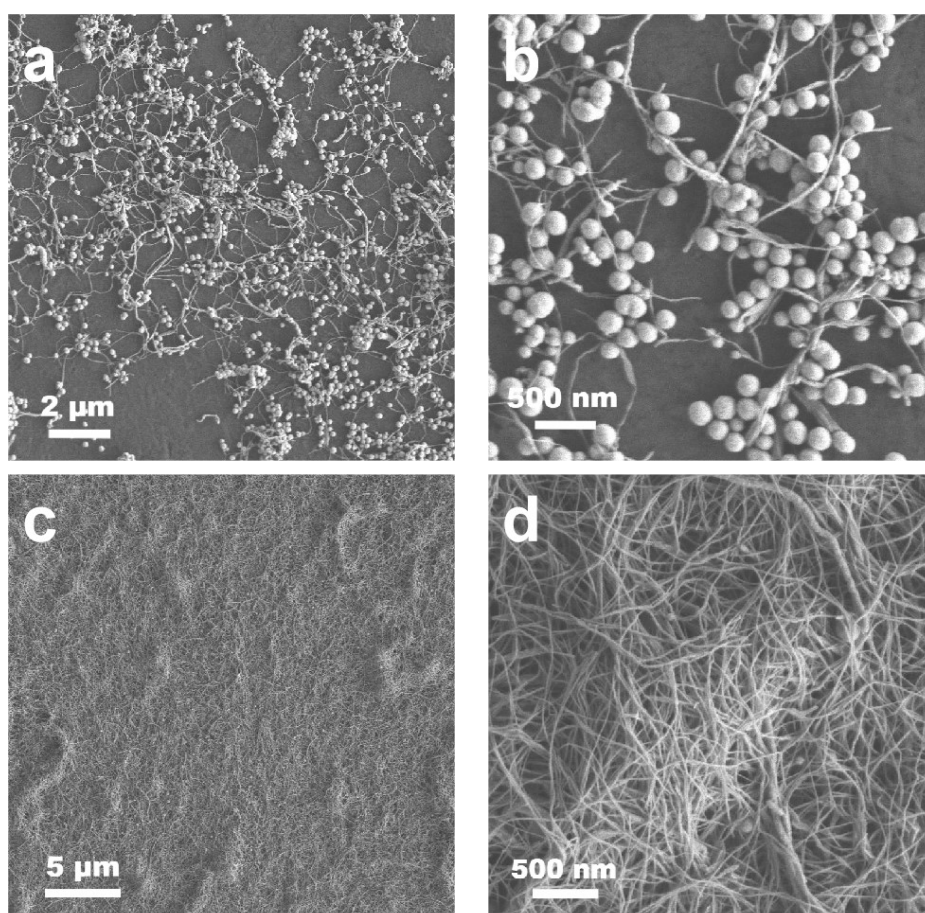

Figure S4. The comparison of the products obtained in glass vials (a-b) and PP vials (c-d). The concentrations of CTAB,  $\text{HAuCl}_4$ , EGT and AA were 8, 0.4, 0.1, 8 mM, respectively.

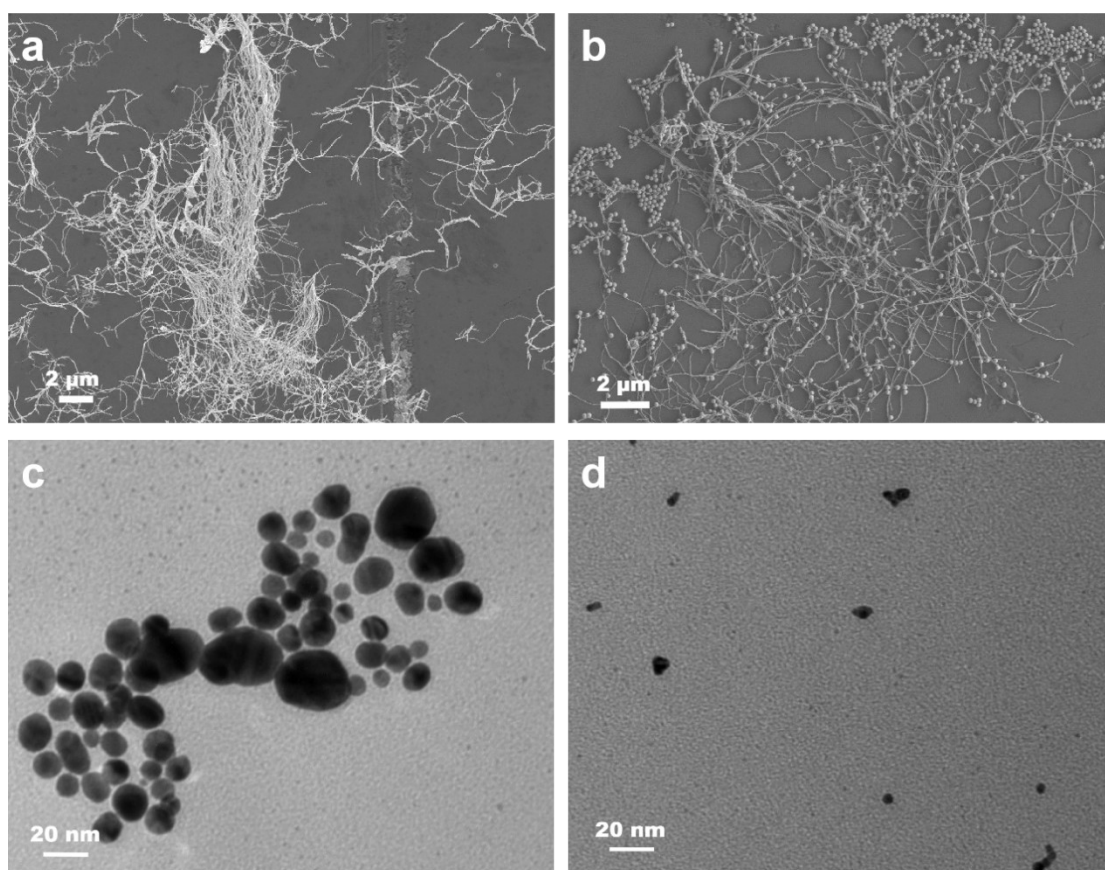

Figure S5. SEM images of gold nanowires generated with  $\text{NaBH}_4$ -seeds (a) and CA-seeds (b). TEM images of  $\text{NaBH}_4$ -seeds (c) and CA-seeds (d). Although the size of these seeds was in a range from several nanometers to 20 nm, the diameter of corresponding gold nanowires was still in a narrow distribution. The concentration of CTAB,  $\text{HAuCl}_4$ , EGT and AA in (a-b) were 16, 0.4, 0.06, 8 mM respectively. The adding amount of seeds were 25  $\mu\text{L}$ .

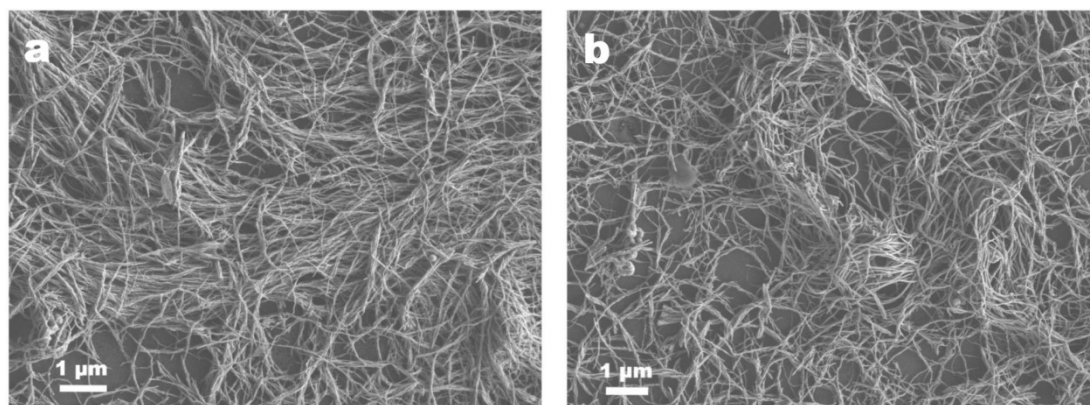

Figure S6. SEM images of gold nanowires generated in the molar ratio of  $\text{HAuCl}_4$ :AA at 1:1.25 (a) and 1:2.5 (b). The concentrations of CTAB,  $\text{HAuCl}_4$ , EGT and AA were (a) 8, 0.4, 0.1, 0.5 mM and (b) 8, 0.4, 0.1, 1 mM, respectively.

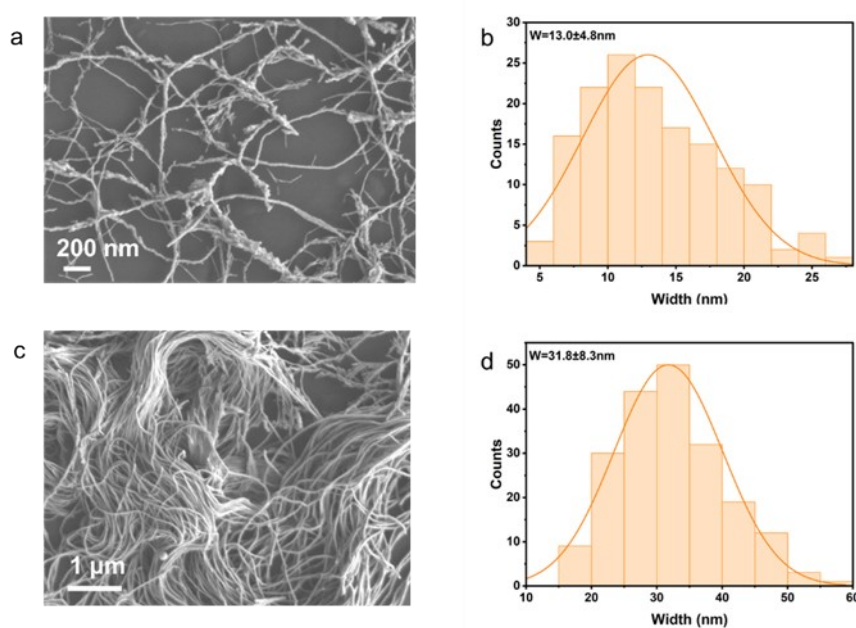

Figure S7. (a, c) SEM image of gold nanowires in two different CTAB concentrations. The preparation conditions were as following: CTAB 16 mM (a) or 8 mM (c),  $\text{HAuCl}_4$  0.4 mM, EGT 0.2 mM, and AA 8 mM. (b, d) The histogram of diameter distribution of gold nanowires in (a) or (c).

The diameter distribution of these isolated nanowires in (a) is around 13 nm, but there were many aggregated nanowires which cannot be counted, and they showed branched



feature, thus this sample was not listed as a high-quality gold nanowire.

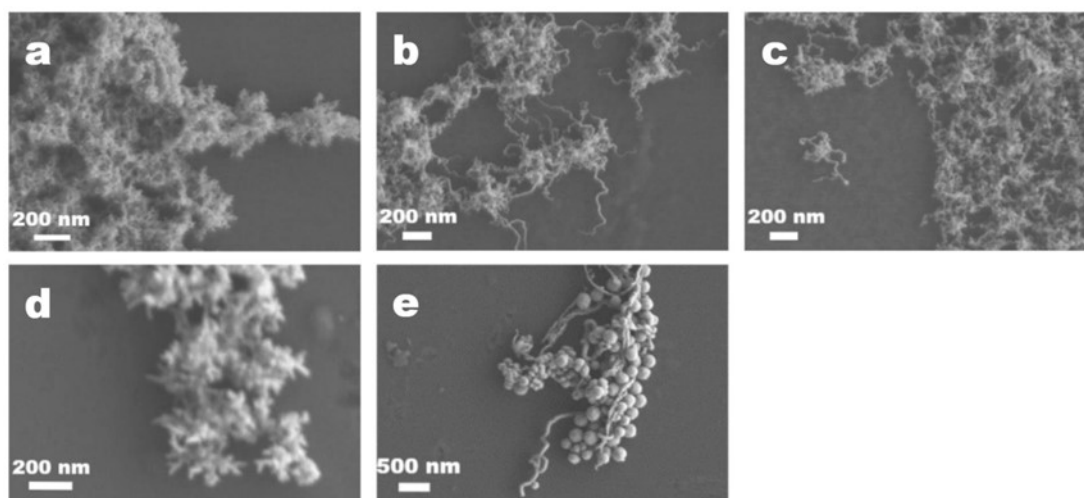

Figure S8. SEM images of gold nanostructures obtained in the lower concentration range of CTAB, 0.5–2 mM. (a) EGT 0.01 mM, CTAB 0.5 mM, (b) EGT 0.05 mM, CTAB 0.5 mM, (c) EGT 0.2 mM, CTAB 0.5 mM, (d) EGT 0.01 mM, CTAB 1 mM, (e) EGT 0.01 mM, CTAB 2 mM. The obtained nanostructures in above conditions are highly branched and twisted, or accompanied by gold nanoparticles.

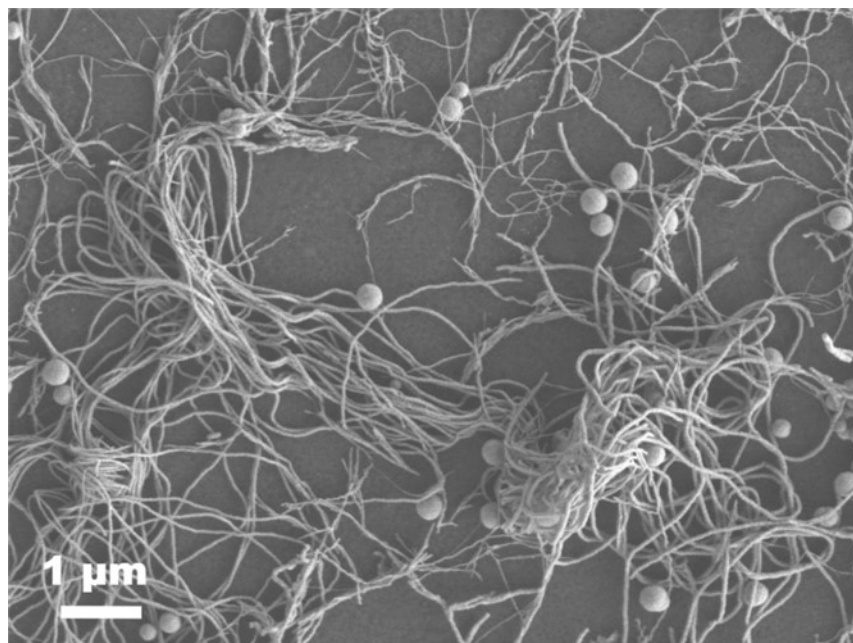

Figure S9. Longer gold nanowires with spheres generated in the condition of 0.01 mM EGT and 8 mM of CTAB.



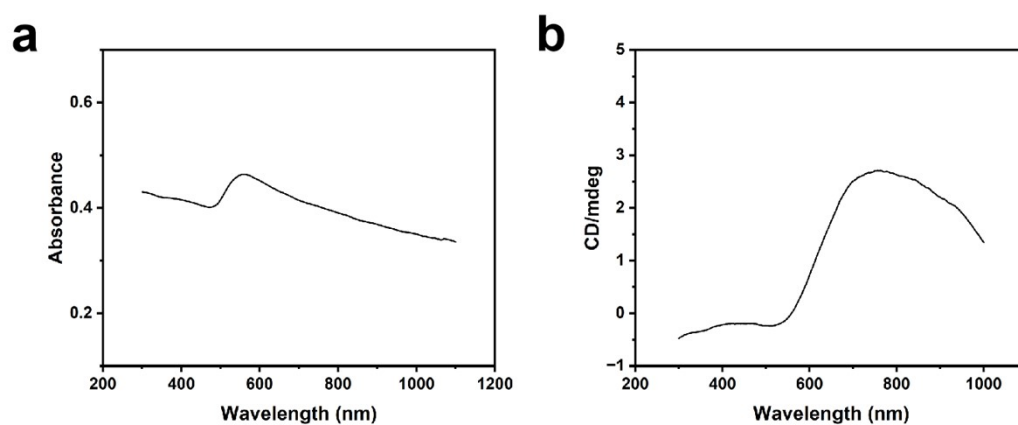

Figure S10. Extinction spectrum (a) and CD spectrum (b) of gold nanowires generated in the condition of 0.1 mM EGT and 16 mM of CTAB.

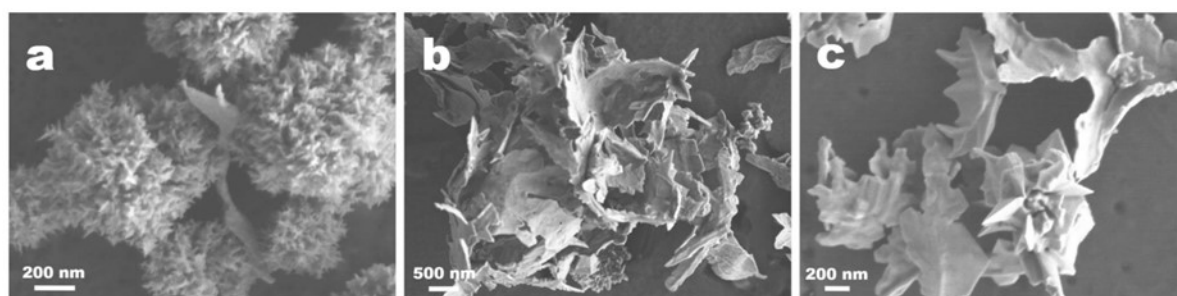

Figure S11. SEM images of the products by adding 0.1 mM L-cysteine (a), L-histidine (b), and betaine (c), to replace EGT. The concentration of CTAB was 16 mM.

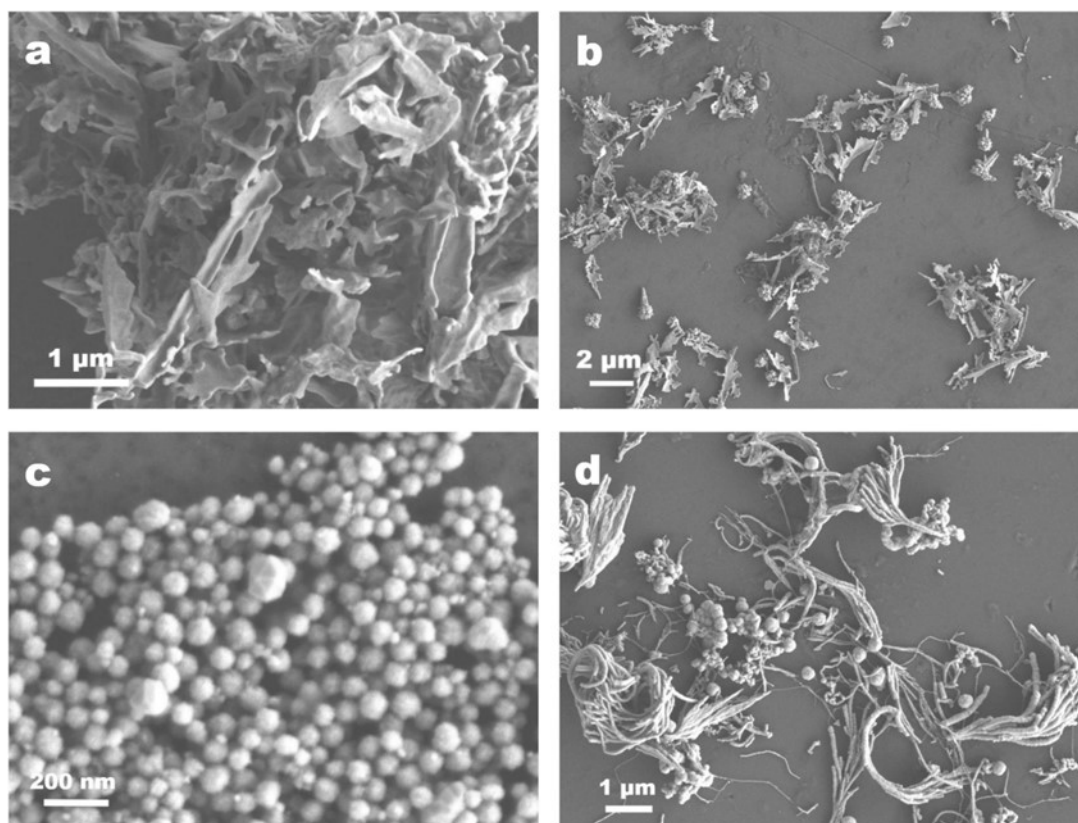

Figure S12. SEM images of gold nanoparticles obtained in different concentration of 2-MAD, 50 (a), 100 (b), 200 (c), 400  $\mu\text{M}$  (d), respectively, with 8 mM CTAB.

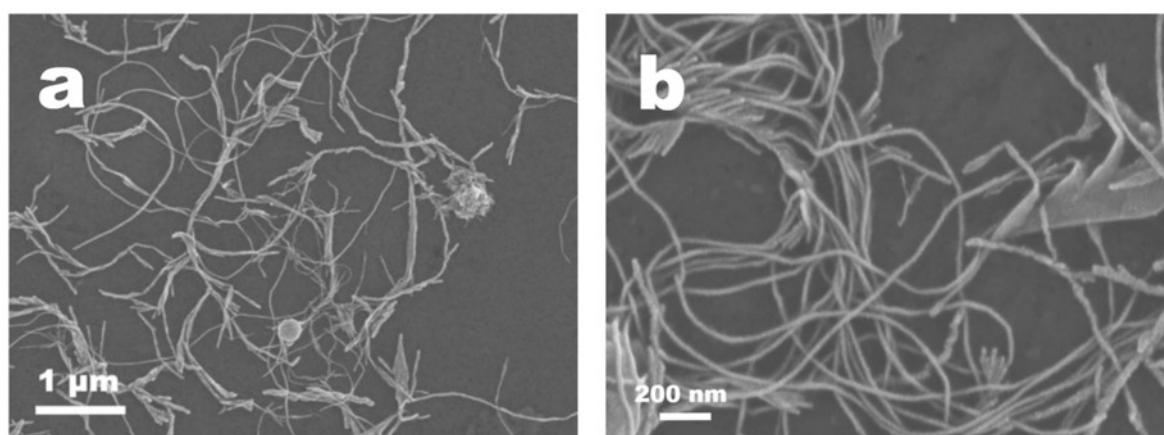

Figure S13. SEM images of gold nanowires obtained in the presence of 16 mM CTAC (a-b) with 0.1 mM EGT.

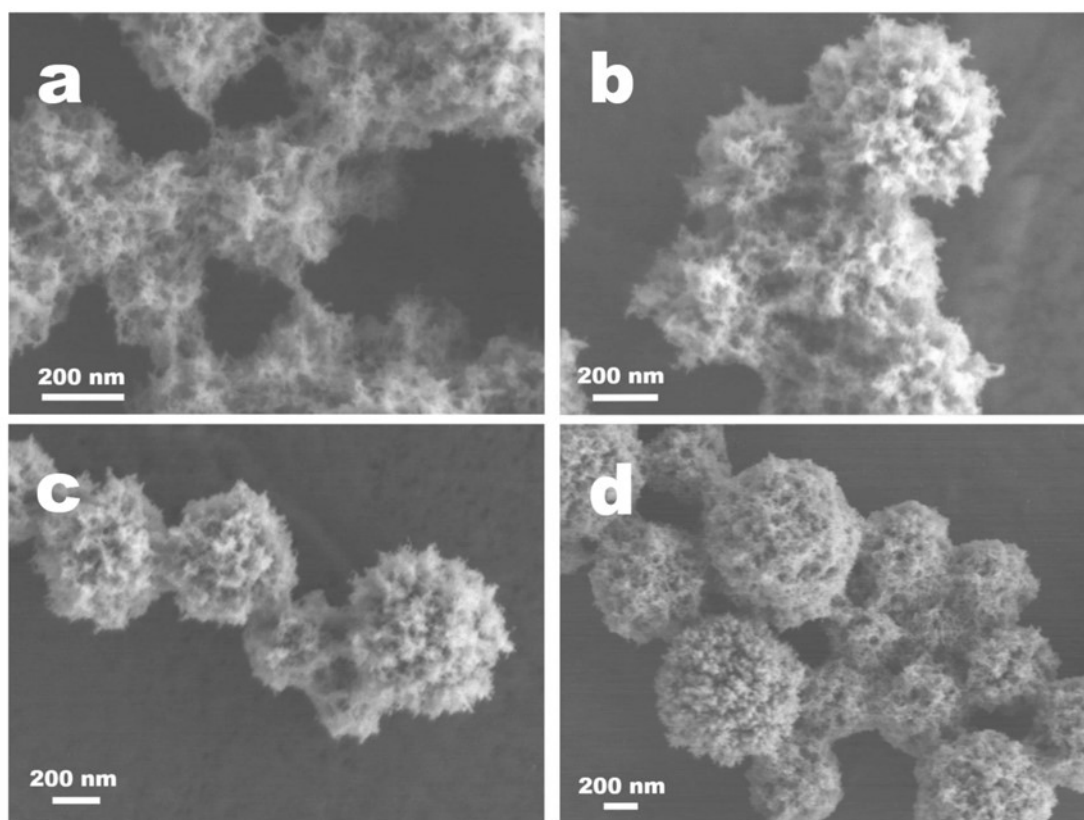

Figure S14. (a-d) SEM images of gold nanoparticles obtained in different concentration of CPC, 2 (a), 4 (b), 8 (c), 16 mM (d), respectively, with 0.1 mM EGT, 0.4 mM  $\text{HAuCl}_4$  and 8 mM AA.

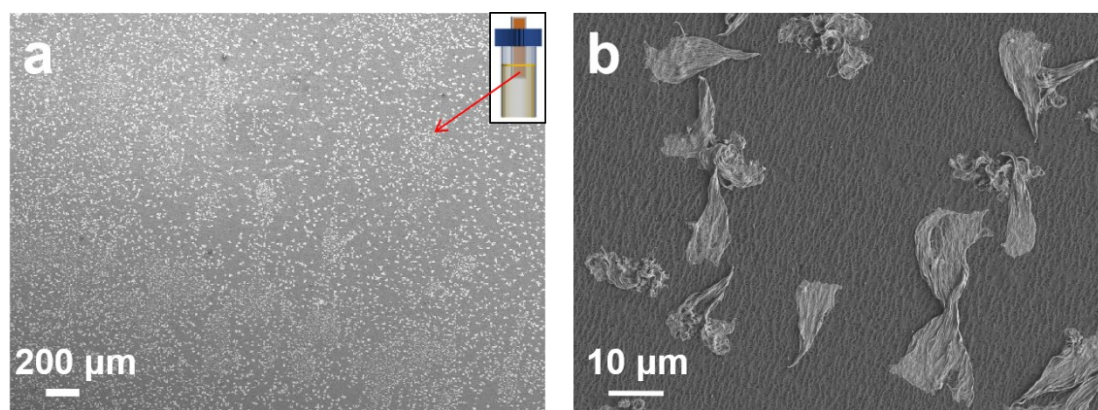

Figure S15. SEM images of gold nanowires aggregated on the PP membrane, which was inserted into the reaction solution partly in a glass vial. (a) Gold nanowires were formed on the part of PP membrane immersed in solution. (b) Gold nanowires aggregated to weaves on PP membrane.

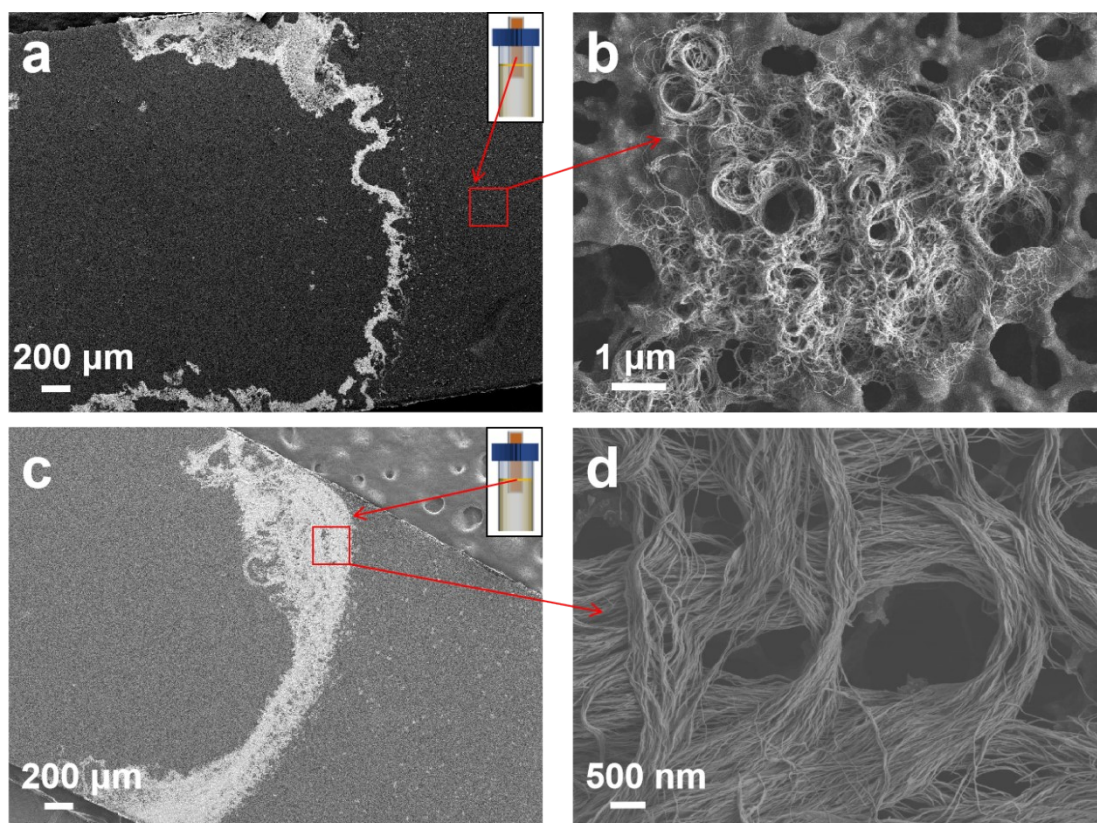

Figure S16. SEM images of gold nanowires aggregated on MCE membranes, which were inserted into reaction solutions partly in the glass vial. (a, b) Gold nanowires can be observed above the contact level of the reaction solutions. (c, d) Most of gold nanowires are aggregated around the contact line of MCE membrane and reaction solution.



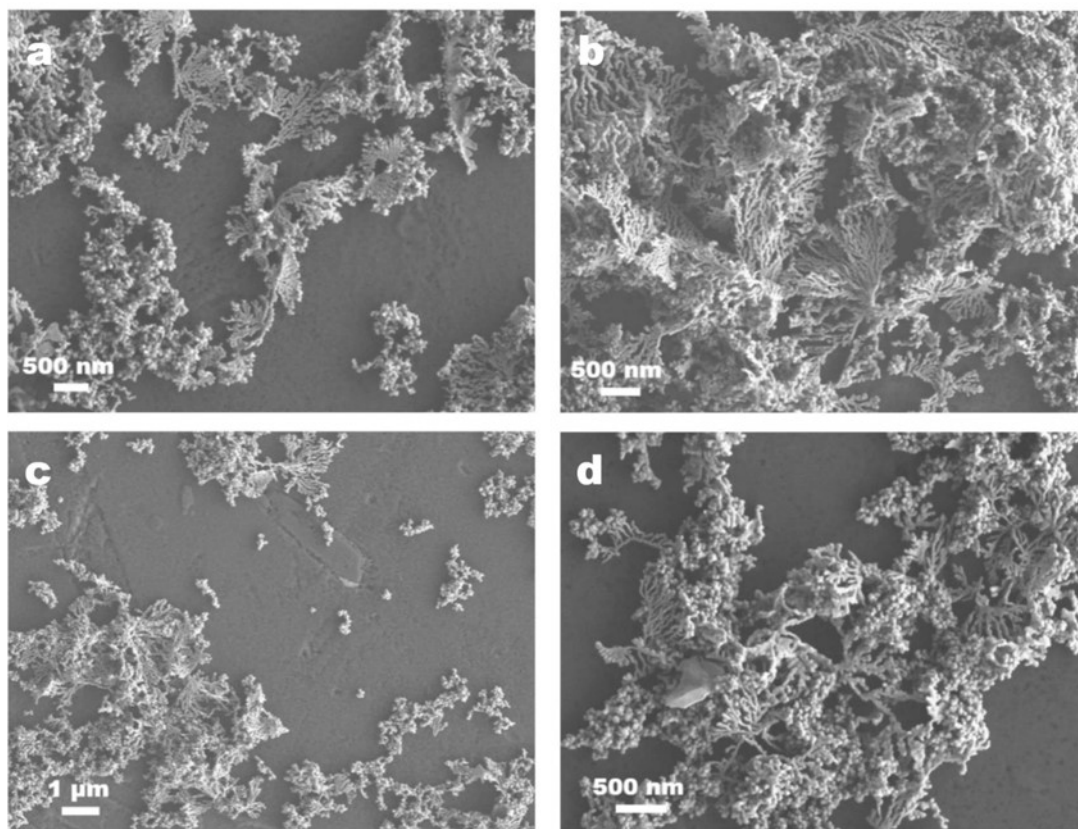

Figure S17. SEM images of branched leaf-shaped gold nanostructures generated under varied concentrations of KI, 7.5 (a), 10 (b), 15 (c), and 25  $\mu\text{M}$  (d), respectively, in the presence of 0.5 mM CTAB and 0.1 mM EGT. The branched leaf-shaped gold nanostructures were obtained under a low concentration of CTAB (0.5 mM) when the concentration of KI (5  $\mu\text{L}$ , 5 mM), EGT was 0.1 mM, AA 8 mM.

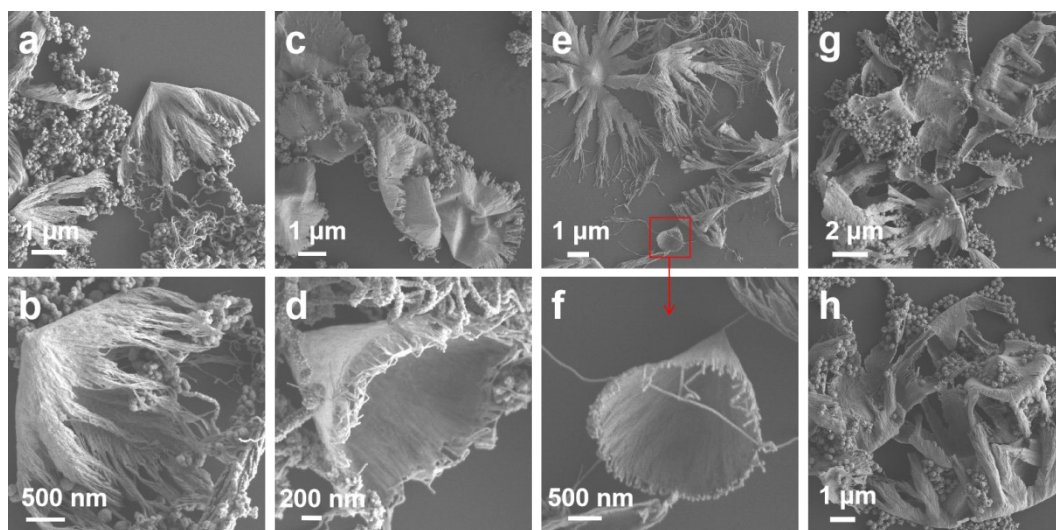

Figure S18. SEM images of assembled gold structures obtained at conditions with  $C_{KI}$  ( $\mu\text{M}$ ):  $C_{CTAB}$  (mM) (a-b) 2:2, (c-d) 3:3, (e-f) 3:4, and (g-h) 4:4, respectively.

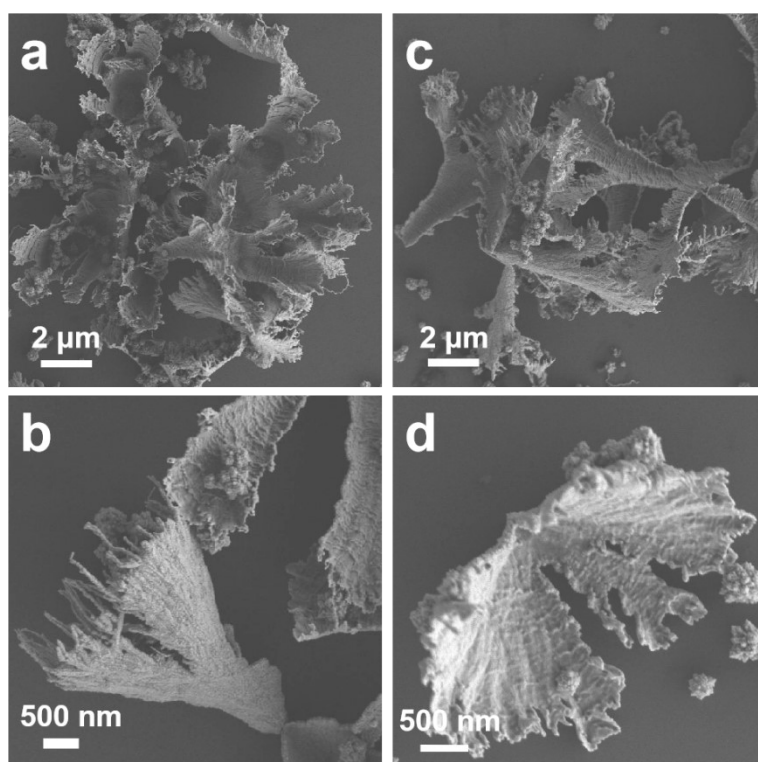

Figure S19. SEM images of the products obtained at conditions with  $C_{KI}$  ( $\mu\text{M}$ ):  $C_{CTAB}$  (mM) (a-b) 5:5 and (c-d) 6:6, respectively.

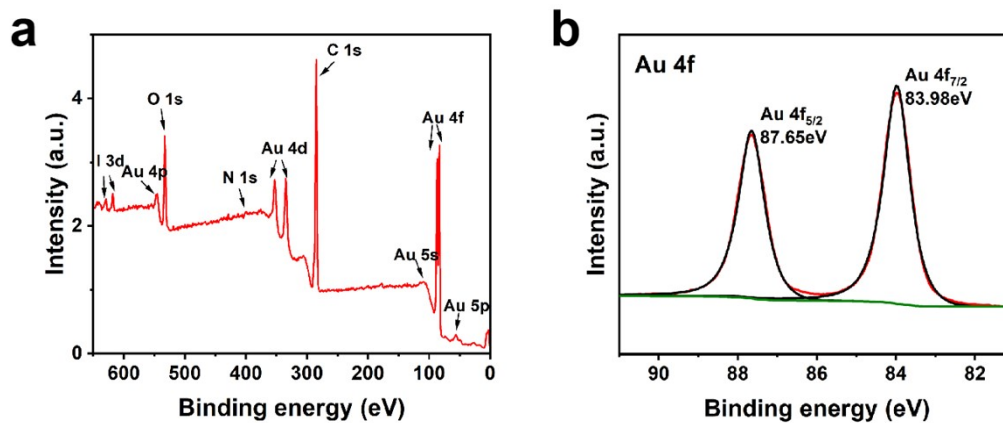

Figure S20. XPS characterization of these assembled 2D leaf-like gold nanostructures, confirming that they are Au (0).

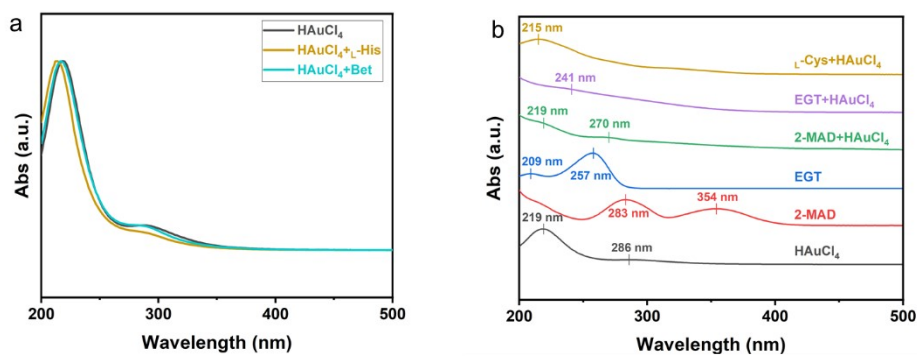

Figure S21. UV-Vis spectra of  $\text{HAuCl}_4$  (0.1 mM) before and after adding histidine/betaine (a) or  $\text{L-Cys}$ /EGT/2-MAD (b). The concentration of  $\text{L-histidine}$ ( $\text{L-His}$ ), betaine (Bet),  $\text{L-Cys}$ , EGT and 2-MAD was 0.1 mM.



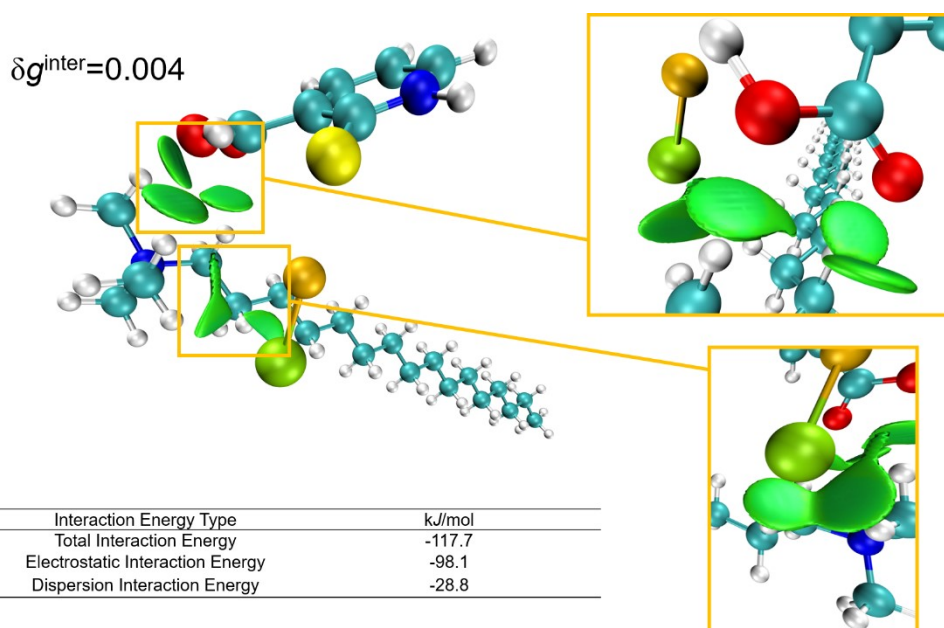

Figure S22. The non-covalent interaction between CTAB and  $[\text{MAD-Au(I)Cl}]^-$  calculated by DFT. This analysis is done with Multiwfn Version 3.8. The red, yellow, green-blue, indigo, gold, green and gray balls represent O, S, C, N, Au, Cl, and H atoms, respectively. The blue colored areas represent prominent attractive weak interaction while the green colored areas represent weaker Van der Waals reaction.
